# Supplementary material
Source: PubMed Central journal article supplement (PMC9435976)

## **Supplemental Material**

Supplemental Table 1. Target tacrolimus trough levels based on time post-transplant.

Higher tacrolimus trough levels are targeted immediately after transplant to avoid acute rejection of the kidney graft

Supplemental Table 2. Routine post-transplant surveillance as per Lucile Packard Children's Hospital Kidney Transplant Protocol

Supplemental Table 3. Results of Mann-Whitney U test comparing tacrolimus inpatient variability in patients who formed C1q-binding de novo DSA with non-DSA formers for all ages and for each age group

Supplemental Table 4. Association between graft loss and other variables in the outcome cohort (n=220)

Supplemental Figure 1. Percentile curves for tacrolimus CV by time post-transplant, stratified by age at time of transplant. (A) Patients transplanted at age 1-12 years and (B) patients transplanted at age 13-25 years.

**Supplemental Table 1.** Target tacrolimus trough levels based on time post-transplant. Higher tacrolimus trough levels are targeted immediately after transplant to avoid acute rejection of the kidney graft

| Time post-transplant                                    | Target trough levels (ng/mL) |
|---------------------------------------------------------|------------------------------|
| Day 0 to week 2 (day 0 to 14 days)                      | 12-15                        |
| Day 15 to week 8 (days 15 to 56)                        | 10-12                        |
| Week 9 to week 12 (days 57 to 84)                       | 7-10                         |
| After 12 weeks ( ≥85 days)                              | 5-7                          |
| After 6-month biopsy if calcineurin inhibitor toxicity  | 4-6                          |
| After 12-month biopsy if calcineurin inhibitor toxicity | 3-5                          |

**Supplemental Table 2.** Routine post-transplant surveillance as per Lucile Packard Children's Hospital Kidney Transplant Protocol

| Routine post-transplant surveillance                         | Number of months post-transplant |   |   |   |   |   |   |   |   |   |    |    |    |    |  |
|--------------------------------------------------------------|----------------------------------|---|---|---|---|---|---|---|---|---|----|----|----|----|--|
|                                                              | 0                                | 1 | 2 | 3 | 4 | 5 | 6 | 7 | 8 | 9 | 10 | 11 | 12 | 24 |  |
| Protocol kidney allograft biopsies, reviewed by pathologists |                                  |   |   |   |   |   | ✓ |   |   |   |    |    | ✓  | ✓  |  |
| Measurement of donor-specific antibodies (serum)             | ✓                                | ✓ | ✓ | ✓ |   |   | ✓ |   |   |   |    |    | ✓  |    |  |
| Transplant clinic visits (twice/week to monthly)             | ✓                                | ✓ | ✓ | ✓ | ✓ | ✓ | ✓ | ✓ | ✓ | ✓ | ✓  | ✓  | ✓  | ✓  |  |

**Supplemental Table 3.** Results of Mann-Whitney U test comparing tacrolimus inpatient variability in patients who formed C1q-binding *de novo* DSA with non-DSA formers for all ages and for each age group

|                  | <b>De novo DSA-</b> | <b>De novo DSA+</b> | <b>P value</b> |
|------------------|---------------------|---------------------|----------------|
| <b>Age group</b> | Tacrolimus IPV (%)  | Tacrolimus IPV (%)  |                |
| All ages         | 27.6 (19.7-38.0)    | 37.9 (28.2-47.8)    | <0.001         |
| 1-6 years        | 30.6 (21.7-40.2)    | 38.2 (27.9-47.4)    | <0.001         |
| 7-12 years       | 28.5 (20.5-38.8)    | 38.8 (27.5-47.7)    | <0.001         |
| 13-17 years      | 25.0 (17.5-35.4)    | 37.7 (28.4-47.7)    | <0.001         |
| 18+ years        | 23.1 (17.6-28.5)    | 38.6 (29.9-60.8)    | <0.001         |

*DSA*, Donor-specific antibodies

*IPV*, Inpatient variability

Tacrolimus IPV is presented as median (interquartile range) and was calculated using tacrolimus values after 10 months post-transplant.

**Supplemental Table 4.** Association between graft loss and other variables in the outcome cohort (n=220)

| Variable                             | Bivariate analyses        | Multivariate analysis               |                                     |
|--------------------------------------|---------------------------|-------------------------------------|-------------------------------------|
|                                      |                           | Model 1 <sup>a</sup><br>HR (95% CI) | Model 2 <sup>b</sup><br>HR (95% CI) |
| Age at transplant, years             | <b>1.21 (1.05-1.39)</b>   |                                     |                                     |
| Age at tacrolimus measurement, years | <b>1.20 (1.05-1.36)</b>   |                                     |                                     |
| Sex, male                            | 0.65 (0.21-1.96)          |                                     |                                     |
| Living donor                         | 2.55 (0.61-10.65)         |                                     |                                     |
| HLA match                            | 0.67 (0.42-1.07)          |                                     |                                     |
| Peak PRA                             | 1.00 (0.98-1.02)          |                                     |                                     |
| Tacrolimus level, ng/mL              | 0.95 (0.75-1.21)          |                                     |                                     |
| Presence of C1q-binding de novo DSA  | <b>36.35 (4.73-279.5)</b> |                                     |                                     |
| Tacrolimus IPV (continuous variable) | <b>1.03 (1.01-1.04)</b>   |                                     |                                     |
| Tacrolimus IPV >30% (high vs. low)   | <b>8.69 (1.89-40.00)</b>  | 3.91 (0.75-20.36)                   |                                     |
| Tacrolimus IPV by quartiles*         |                           |                                     |                                     |
| 1 <sup>st</sup> quartile             | -                         |                                     | -                                   |
| 2 <sup>nd</sup> quartile             | 2.14 (0.29-15.62)         |                                     | <b>2.76 (1.06-7.17)</b>             |
| 3 <sup>rd</sup> quartile             | <b>16.68 (0.06-3.44)</b>  |                                     | 2.30 (0.61-8.70)                    |
| 4 <sup>th</sup> quartile             | <b>6.35 (1.06-38.15)</b>  |                                     | 2.94 (0.86-10.02)                   |

Bold text denotes p<0.05

<sup>a</sup> Model 1: Adjusted for presence of C1q-binding de novo DSA and tacrolimus IPV categorized as below or over 30%

<sup>b</sup> Model 2: Adjusted for presence of proteinuria and tacrolimus IPV categorized by quartiles.

\* Tacrolimus IPV cutoffs by quartiles calculated from entire cohort: 1<sup>st</sup> quartile (25<sup>th</sup> percentile) 20.6%; 2<sup>nd</sup> quartile (50<sup>th</sup> percentile) 29.5%; 3<sup>rd</sup> quartile (75<sup>th</sup> percentile) 41.1%; 4<sup>th</sup> quartile (100<sup>th</sup> percentile) 173.2%.

HR, *Hazard ratio*

CI, *Confidence interval*

IPV, *tacrolimus inpatient variability*

HLA, *Human leukocyte antigen*

Peak PRA, *Historic peak panel reactive antibodies*

DSA, *Donor-specific antibodies*

**Supplemental Figure 1.** Percentile curves for tacrolimus CV by time post-transplant, stratified by age at time of transplant. (A) Patients transplanted at age 1-12 years and (B) patients transplanted at age 13-25 years.

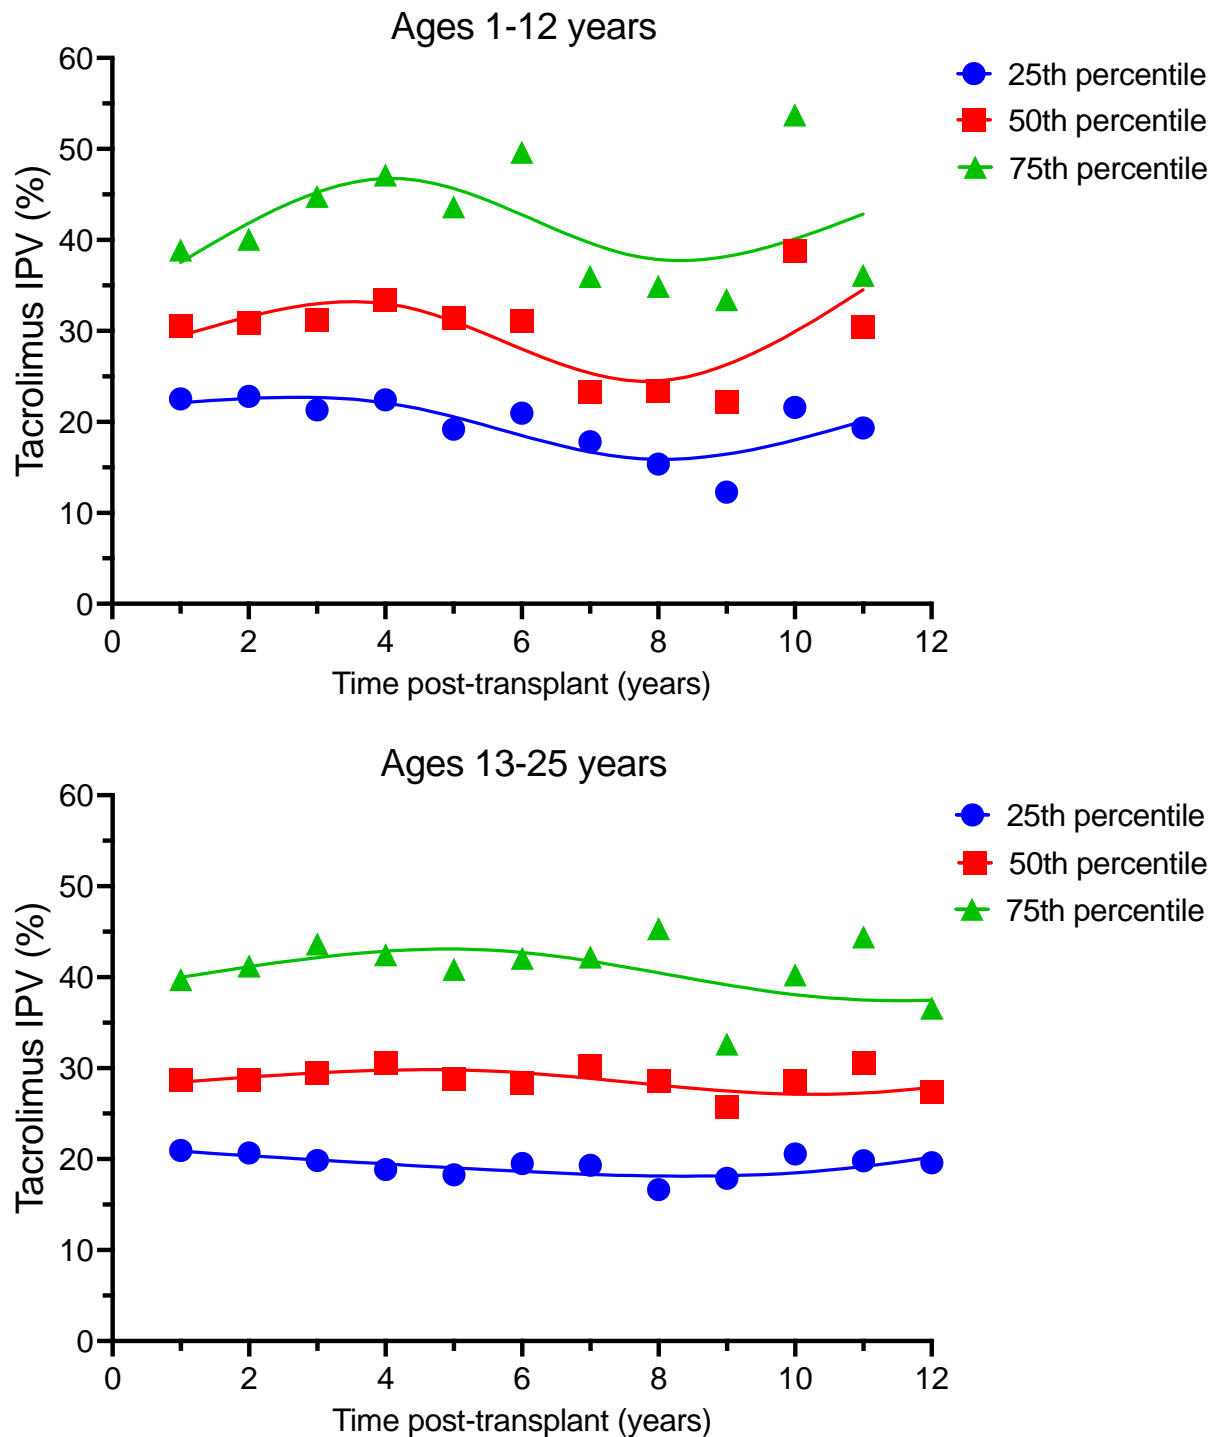

Supplement: CJN.16421221-SupplementaryData1.pdf [file CJN.16421221-SupplementaryData1.pdf]
